# Supplementary material for: Kin-Avoidance in Cannibalistic Homicide
Source: Front Psychol. 2020 Aug 31;11:2161. doi: 10.3389/fpsyg.2020.02161 (PMC7488386; doi:10.3389/fpsyg.2020.02161)
Supplement: Supplementary file 1 [file Data_Sheet_1.CSV]

Cannibal ID	Cannibal initials	Sex	Offender Country	Offender Birth	Offender Death	Offender Instutionalized	Offender Voices/ Halluzinations	Trial	Plea	Trial Verdict/outcome	Offender Mental score	Victim # upper bound	Victim # lower bound	Victim # best estimate	Cannibalized victims	Non-kin victims	Kin victims	Cannibalized pieces
1	K.D.	M	Germany	1860	1924	0	0	No	N/A	N/A	?	42	31	42	31	42	0	Meat, entire body
2	P.K.	M	Germany	1883	1931	0	0	Yes	Guilty	Death penalty	0	9	9	9	2	9	0	Blood
3	C.F.W.G.	M	Germany	1863	1922	0	0	half	Guilty	N/A	?	50	3	23	?	23	0	Meat
4	F.H.K.H.	M	Germany	1879	1925	1	1	Yes	Insanity	Death penalty	3	27	24	27	?	27	0	Meat
5	A.F.	M	USA	1870	1936	?	1	Yes	Insanity	Death penalty	2	100	3	8	?	8	0	Meat, blood, entire body
6	A.R.	M	USA	1895	1935	?	?	Yes	Guilty	Death penalty	?	6	2	2	1	1	0	Meat
7	L.C.	F	Italy	1894	1970	0	0	Yes	Insanity	Insanity/imprisonment	2	3	3	3	3	3	0	Blood
8	J.G.H.	M	UK	1909	1949	0	0	Yes	Insanity	Death penalty	1	9	6	6	6	6	0	Blood
9	N.H.	M	UK	1917	1946	0		Yes	Insanity	Death penalty	1	2	2	2	?	2	0	Breasts, nipples
10	B.O.	M	Germany	1881	1948	0	0?	Yes	Guilty	Imprisonment	0	1	1	1	1	0	1	Meat, heart, liver, kidneys
11	D.H.G.	M	USA	1933	1991	0	0	Yes	Unknown	Death penalty	0	110	9	17	>3	15	1	Genitals, extremities
12	J.K.	M	Germany	1933	1991	0	0	Yes	Unknown	Imprisonment	0	20	8	14	?	14	0	Extremities
13	J.K.	M	Czechoslovakia	1930	1964	?	?	Yes	Unknown	Death penalty	?	2	2	2	2	2	0	Internal organs
14	P.R.F.	M	Brazil	1954		0	?	Yes	Unknown	Imprisonment	?	100	71	71	1	71	1	Heart
15	W.C.B.	M	Canada	1948	2006	0?	0?	Yes	Unknown	Imprisonment	0?	5	4	4	4	4	0	Breasts/nipples
16	S.D.B.	M	USA	1948		?	?	Yes	Unknown	Imprisonment	?	2	2	2	1	2	0	Heart
17	D.M.N.	M	Canada	1939	1999	0	0?	Yes	Insanity	Imprisonment	1	8	2	8	1	8	0	Heart, genitals
18	M.E.	M	Germany	?	?	0	0	Yes	Guilty	Imprisonment	0	1	1	1	1	1	0	Meat
19	A.F.	M	USA	1942		0	0	Yes	Insanity	Unknown	2	1	1	1	1	1	0	Genitals
20	A.S.	M	USA	1945	2008	0	0	Yes	Insanity	Imprisonment	1	14	13	13	?	13	0	Genitals, internal organs
21	N.B.L.B.	M	USA	1957	2008	1	0	Yes	Not guilty	Imprisonment	1	3	0	2	1	2	0	Entire body
22	T.J.H.	M	UK	1945	2012	0?	0?	Yes	Insanity	Imprisonment	1	4	3	3	1	3	0	Breasts/Nipples
23	M.W.	M	USA	1958		0	0	Yes	Guilty	Unknown	0	1	1	1	1	1	0	Meat
24	G.W.C.	M	USA	1956	2014	1	1	No (too mentally insane)	N/A	N/A	4	1	1	1	1	0	1	Entire body, heart
25	R.T.C.	M	USA	1950	1980	1	1	Yes	Insanity	Death penalty	3	6	6	6	2	6	0	Breasts/nipples, internal organs, blood, brains
26	L.H.	M	Czechoslovakia	1958 - August 7, 1986	1986	?	?	Yes	Unknown	Death penalty	?	7	5	5	1	5	0	No information
27	J.L.D.	M	USA	1960	1994	0	0	Yes	Insanity	Imprisonment	1	17	16	17	?	17	0	Heart, meat
28	A.C.	M	Russia,Ukraine, Usbek	1936	1994	0	0	Yes	Insanity	Death penalty	1	56	52	54	?	54	0	Breasts/nipples, tongue, face, genitals
29	Z.Y.	M	China	1956	2013	0	0?	Yes	Guilty	Death penalty	0	17	11	12	?	12	0	Eyes, meat
30	A.V.S.	M	Russia,kazan	1943	1987	0	0	Yes	Insanity	Death penalty	0.5	7	7	7	7	7	0	Blood, heart, liver, lungs
31	N.D.	M	Kazahstan	1952		0?	0?	Yes	Insanity	Institutionalized	2	9	9	9	9	9	0	Blood, breasts/nipples, meat, kidneys, heart
32	R.G.	M	USA	1953		?	?	Yes	Unknown	Imprisonment	?	20	17	17	?	17	0	Breasts/Nipples
33	E.S.	M	USA	1958		?	?	Yes	Unknown	Imprisonment	?	20	17	17	?	17	0	Breasts/Nipples
34	A.K.	M	USA	1961	1999	?	?	Yes	Unknown	Death penalty	?	20	17	17	?	17	0	Breasts/Nipples
35	T.K.	M	USA	1958		?	?	Yes	Unknown	Imprisonment	?	20	17	17	?	17	0	Breasts/Nipples
36	I.S.	M	Japanese /france	1949		0	0	Yes	Insanity	Institutionalized	2	1	1	1	1	1	0	Breasts/nipples, face
37	J-A.H.	M	Estonia	1957	1982	0	0?	Yes	Unknown	N/A	?	3	3	3	1	3	0	Meat, genitals
38	J.J.	M	USA	1963	1996	0	0	Yes	Guilty	Death penalty	0	3	2	3	2	2	0	Extremities
39	M.Z.	F	Germany	1957?	?	0?	0	Yes	Insanity	insanity/ reduced sentence	3	1	1	1	1	1	0	Meat
40	B.C.	M	USA	1951		?	?	Yes	Unknown	Unknown	?	1	1	1	1	1	0	Breasts/Nipples
41	H.C.	M	USA	1952		?	?	Yes	Unknown	Imprisonment	?	2	2	2	1	2	0	No information
42	G.M.H.	M	USA	1943	1999	1	0	Yes	Insanity	Death penalty	2	2	2	2	1	2	0	No information
43	J.W.	M	USA	1964		0?	0?	Yes	Insanity	Imprisonment	1	1	1	1	1	1	0	Extremities
44	F.G.E.	M	Spain	1948	2014	1	1	Yes	Insanity	Institutionalized	4	15	11	11	some	11	0	Heart, Internal Organs, genitals
45	T.M.	M	Japan	1962	2008	0	0.5	Yes	Insanity	Death penalty	1.5	4	4	4	1	4	0	Extremities
46	T.A.W.	F	Australia	1965		0	0	Yes	Guilty	Imprisonment	0	1	1	1	1	1	0	Blood
47	D.R.	M	USA	1960		1	0	Yes	Insanity	Institutionalized	3	1	1	1	1	1	0	Brain, extremities
48	S.W.	M	South Africa	1966		0	1?	Yes	Unknown	Imprisonment	?	17	9	9	1	9	1	Breasts/Nipples
49	A.N.S.	M	Russia	1970		1	0	Yes	Insanity	Institutionalized	3	80	4	20	?	20	0	No information
50	O.A.N.	F	USA	1968		0	0	Yes	Insanity	Imprisonment	1	1	1	1	1	1	0	Meat
51	M.C.A.	M	Brazil	1967		0	1	Yes	Unknown	Institutionalized	?	14	14	14	2	14	0	Blood
52	I.K.	M	Russia	1962		1	0?	Yes	Insanity	Institutionalized	3	3	3	3	3	3	0	Meat
53	J.J.B.	M	Australia	1966		0	0	Yes	Not guilty	Imprisonment	0	12	6	12	?	12	0	No information
54	R.W.	M	Australia	1971		0	0	Yes	Guilty	Imprisonment	0	12	3	12	?	12	0	No information
55	J.V.	M	Australia	1979		0	0	Yes	Guilty	Imprisonment	0	12	1	12	?	12	0	Meat
56	P.B.	M	UK	1969		1	0	Yes	Insanity	Institutionalized	3	3	3	3	2	3	0	Brain
57	K.K.	M	Korea	1969	1994	?	?	Yes	Unknown	Death penalty	?	5	5	5	?	5	0	No information
58	V.L.	M	Romania	1954		?	?	Yes	Unknown	Unknown	?	3	3	3	yes	3	0	No information
59	D.V.	M	Venezuela	1957		1	?	No (too mentally insane)	N/A	N/A	3	11	10	11	11	11	0	Meat, tongue, eyes
60	J.R.M.	M	USA	1955	2017	0	0	Yes	Guilty	Imprisonment	0	10	3	6	2	6	0	Meat
61	V.N.N.	M	Russia	1959		0?	0?	Yes	Unknown	Imprisonment	0	2	2	2	2	2	0	Brain, heart, liver, extremities, meat
62	J.S.E.	M	Finland	1975		?	?	Yes	Unknown	Imprisonment	?	1	1	1	1	1?	0?	Genitals, organs
63	D.J.H.	M	UK	1975		0	0	Yes	Insanity	Imprisonment	1	1	1	1	1	1	0	Meat
64	J.A.O.	M	USA	1981		?	?	Yes	Insanity	Unknown	?	2	2	2	1	2	0	Brain, heart
65	K.K.	F	Australia	1955		1	0	Yes	Insanity	Imprisonment	1	1	1	1	1	1	0	Meat
66	J.R.	M	UK	1971		0?	1	Yes	Insanity	Institutionalized	3	1	1	1	1	1	0	Liver, internal organs, eyes
67	A.M.	M	Germany	1961		0	0	Yes	Guilty	Imprisonment	0	1	1	1	1	1	0	Genitals, meat
68	M.V.S.	M	USA	1978		0	1	Yes	Insanity	Unknown	2	4	4	4	1	4	0	Extremities
69	A.S.	M	USA	1976		0	0	Yes	Insanity	Imprisonment	1	1	1	1	1	1	0	Lungs, meat
70	D.R.	M	Germany	1984		0	1	Yes	Not guilty	Imprisonment	2	1	1	1	1	1	0	Blood
71	M.R.	F	Germany	1987		0	1	Yes	Not guilty	Imprisonment	2	1	1	1	1	1	0	Blood
72	�.D.	M	Turkey	1984		1	0	Yes	Insanity	Institutionalized	3	3	3	3	1	1	0	Meat
73	T.S.	M	Germany	1979		0	0	No (too mentally insane)	N/A	N/A	2	1	1	1	1	0	1	Extremities, meat
74	J.K.	M	Denmark	1967		?	0	Yes	Not guilty	Imprisonment	?	1	1	1	1	1	0	Breasts, nipples
75	Y.Y.	M	Korea	1970		0	0	Yes	Guilty	Death penalty	0	26	20	20	11	20	0	Internal organs
76	G.D.A.	M	Mexico	1978	2012	0?	1	Yes	Unknown	Imprisonment	1	2	1	2	1	1	0	Heart, meat, kidney, extremities, lung
77	S.K.	M	India	1972		0	0	Yes	Not guilty	Death penalty	0	38	19	19	?	19	0	Liver
78	L.P.	M	Sweden	1977		0?	1	Yes	Insanity	Institutionalized	3	2	2	2	2	2	0	Blood, meat
79	K.R.U.	M	USA	1979		0	0	Yes	Insanity	Death penalty	1	1	1	1	1	1	0	No information
80	N.C.	M	France	1971		1	0	Yes	Insanity	Imprisonment	2	1	1	1	1	1	0	Heart, meat
81	J.L.C.Z.	M	Mexico	1969	2007	?	0	No	N/A	N/A	?	9	2	3	3	3	0	Extremities
82	R.A.	M	Austria	1988		1	1	No (too mentally insane)	N/A	N/A	4	1	1	1	1	1	0	Blood, brain, internal organs, meat
83	J.B.N.	M	Brazil	1958		0?	1	Yes	Guilty	Imprisonment	1	3	3	3	3	3	0	Meat
84	I.C.P.	F	Brazil	1961		0?	0	Yes	Guilty	Imprisonment	0	3	3	3	3	3	0	Meat
85	B.C.O.S.	F	Brazil	1987		0?	0	Yes	Guilty	Imprisonment	0	3	3	3	3	3	0	Meat
86	A.M.	M	UK	1976		0	0	Yes	Insanity	Imprisonment	1	1	1	1	1	1	0	Extremities
87	V.W.L.	M	Canada	1969		1	1	Yes	Insanity	Institutionalized	4	1	1	1	1	1	0	Meat
88	T.G.	M	Russia	1981		?	?	?	Unknown	Unknown	?	1	1	1	1	0	1	Meat
89	M.G.	M	Russia	1986		?	?	?	Unknown	Unknown	?	1	1	1	1	0	1	Meat
90	Y.M.	M	Russia	1990		0	0?	Yes	Unknown	Unknown	?	1	1	1	1	1	0	Internal organs
91	O.S.	F	USA	1976		1	1	Yes	Insanity	Institutionalized	4	1	1	1	1	0	1	Brain, extremities
92	A.B.	M	Russia	1988		0	0	Yes	Insanity	Unknown	1	11	9	11	?	11	0	Liver, heart, meat
93	S.G.	M	Russia	1982		0	0	Yes	Guilty	Imprisonment	0	1	1	1	1	0	1	Extremities
94	S.S.G.	M	UK	1969		1	0	Yes	Guilty	Imprisonment	1	3	3	3		3	0	Meat
95	M.C.	M	Slovakia	1967	2011	?	?	No	N/A	N/A	?	32	2	2	2	3	0	No information
96	J.O.	M	Germany	1985		0	0	Yes	Insanity	murder/ partially reduced responsibility	1.5	2	2	2	1	2	0	Blood, meat
97	T.L.S.	M	USA	1977		1	1	Yes	Insanity	Institutionalized	4	1	1	1	1	1	0	Brains, eyes, blood
98	I.L.	M	Russia	1990		?	?	?	Unknown	Unknown	?	1	1	1	1	1	0	Meat
99	J.L.	M	USA	1932	2012	?	?	No	N/A	N/A	?	1	1	1	1	1	0	Extremities
100	A.K.	M	USA	1990		?	?	Yes	Insanity	Institutionalized	?	1	1	1	1	1	0	Heart, brain
101	L.R.M.	M	Canada	1982		0	0	Yes	Insanity	Imprisonment	1	1	1	1	1	1	0	Meat
102	L.R.	M	Italia	1968		1	?	Yes	Insanity	Institutionalized	3	1	1	1	1	0	1	No information
103	J.R.	M	France	1987		0	1	Yes	Insanity	Institutionalized	3	1	1	1	1	1	0	Heart, tonge
104	D.G.	M	Germany	1958		0?	0?	Yes	Not guilty	Imprisonment	0	2	1	1	1	1	0	No information
105	G.S.H.	M	USA	1977		0	0	Yes	Guilty	Unknown	0	1	1	1	1	1	0	No information
106	M.W.	M	UK	1980	2014	?	?	No	N/A	N/A	?	1	1	1	1	1	0	Face
107	S.B.	M	Italian in UK	1967	2018	0?	0?	Yes	Not guilty	Imprisonment	0	1	1	1	1	1	0	Meat
108	A.H.	M	USA	1996		?	?	Yes	Unknown	Unknown	?	2	2	2	1	2	0	Face
109	N.B.	F	Russia	1975		0	0	Yes	Unknown	Imprisonment	0.5	30	1	1	1	1	0	Meat
110	D.B.	M	Russia	1982		0	0	Yes	Not guilty	Unknown	0	30	1	1	1	1	0	Meat
111	A.U.	M	Austria	1955		0	?	Yes	Insanity	Imprisonment	1.5	2	1	1	1	1	0	Internal organs
112	A.Y.	M	Russia	1983		?	?	?	Unknown	Unknown	?	1	1	1	1	1	0	Heart
113	A.S.G.	M	Spain	1993		1	1	?	Unknown	Unknown	?	1	1	1	1	0	1	No information
114	Mr.B (Raymond et al.)	M	France	?		1	1	Yes	Insanity	Institutionalized	4	1	1	1	1	0	1	No information
115	Mr D (Raymond et al.)	M	France	?		1	0?	Yes	Insanity	Institutionalized	3	2	2	2	1	0	2	Brain
116	IIIa:1 (Rajs et al.)	M	Sweden	1969		0	0	Yes	Insanity	Institutionalized	2	1	1	1	1	1	0	No information
117	IIIa:4 (Rajs et al.)	M	Sweden	1949		1?	0	Yes	Insanity	Institutionalized	2.5	1	1	1	1	1	0	Meat
118	IIIa or b:5 (Rajs et al.)	M	Sweden	1954		0	0	Yes	Unknown	Unknown	0	1	1	1	1	1	0	Breasts/nipples, genitals, meat
119	IIIa or b:6 (Rajs et al.)	M	Sweden	1942		1	0	Yes	Insanity	Institutionalized	3	1	1	1	1	1	0	Genitals
120	Mr. A (Teixeira et al.)	M	Brazil	1990		0	1	No	N/A	N/A	3	1	1	1	1	0	1	Brain
121	Albanian man (Kapo et al.)	M	Albania	?		1	1	Yes	Insanity	Unknown	3	1	1	1	1	?	?	Internal organs
