# Supplementary material for: Kin-Avoidance in Cannibalistic Homicide
Source: Front Psychol. 2020 Aug 31;11:2161. doi: 10.3389/fpsyg.2020.02161 (PMC7488386; doi:10.3389/fpsyg.2020.02161)
Supplement: Supplementary file 4 [file Data_Sheet_4.CSV]

	Cannibals (1900-2019)	Scotland (1953-1974)	Detroit (1972)	Denmark (1992 - 2016)	Finland (2007-2016)	Iceland (2007-2016)	Norway (2007-2016)	Sweden (2007-2016)
Children	2	11	8	124	60(g)	4(g)	20(g)	30(g)
Parents	8	16	11	67	41(g)	1(g)	24(g)	41(g)
Siblings	4(a)	8	10	24	18(g)	1(g)	5(g)	4(g)
Grand parents	0	4	0	0	1	0	0	0
Other biological	2(b)	2(d)	3(e)	29(f)	6	0	0	0
Intimate partners	21	40	80	379	227	10	84	167
Strangers	231	77	138	135	141	8	47	104
Total known relationships	631/464(c)	273	508	1336	1018	48	294	686
(a) Includes one half-brother
(b) 1 niece, 1 cousin
(c) From 631 victims it is known whether they were kin of the offender, of 464 of those 631 victims we could also distinguish between i.e. unrelated acquaintances and strangers.
(d) 1 aunt, 1 nephew
(e) 1 cousin, 2 nephews
(f) A combination of blood relatives, step relatives, and in-laws. Most are blood family
(g) May include foster parents, foster children, and step siblings, up to 5 per category.
